# Supplementary material for: Intranasal mRNA-LNP vaccination protects hamsters from SARS-CoV-2 infection
Source: PubMed Central journal article supplement (PMC10516494; doi:10.1126/sciadv.adh1655), 2023-09-22
Supplement: sciadv.adh1655_sm.pdf [file sciadv.adh1655_sm.pdf]

Supplementary Materials for  
**Intranasal mRNA-LNP vaccination protects hamsters from  
SARS-CoV-2 infection**

Gabriela Baldeon Vaca *et al.*

Corresponding author: Kapil Bahl, [kapil.bahl@modernatx.com](mailto:kapil.bahl@modernatx.com);  
Alexander Bukreyev, [alexander.bukreyev@utmb.edu](mailto:alexander.bukreyev@utmb.edu)

*Sci. Adv.* **9**, eadh1655 (2023)  
DOI: 10.1126/sciadv.adh1655

**This PDF file includes:**

Figs. S1 to S3  
Tables S1 to S8

**Fig. S1.**

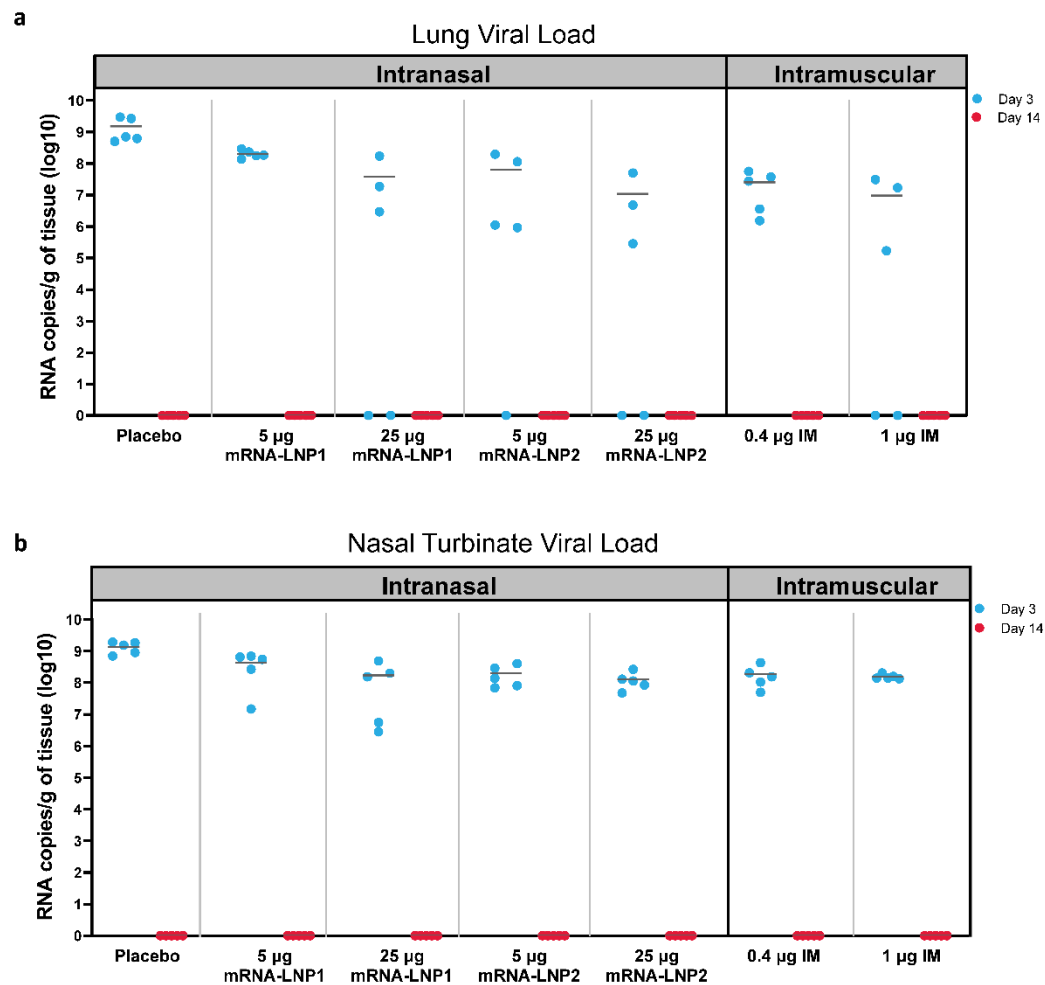

**Fig. S1. Viral load as determined via qRT-PCR through 14 days after SARS-CoV-2 challenge in vaccinated hamsters.** Viral load (sgRNA copies per gram of tissue) at 3 days and 14 days after SARS-CoV-2 challenge in (a) lungs and (b) nasal turbinates of vaccinated hamsters. Animal-level data are shown as dots ( $n = 5$  animals per group), with the grey lines representing the geometric mean of each group. LLOD =  $10^3$  copies/g of tissue.

IM, intramuscular; IN, intranasal; LNP, lipid nanoparticle; mRNA, messenger RNA; qRT-PCR, quantitative reverse transcription polymerase chain reaction; SARS-CoV-2, severe acute respiratory syndrome coronavirus 2; sgRNA, subgenomic RNA.

Fig. S2.

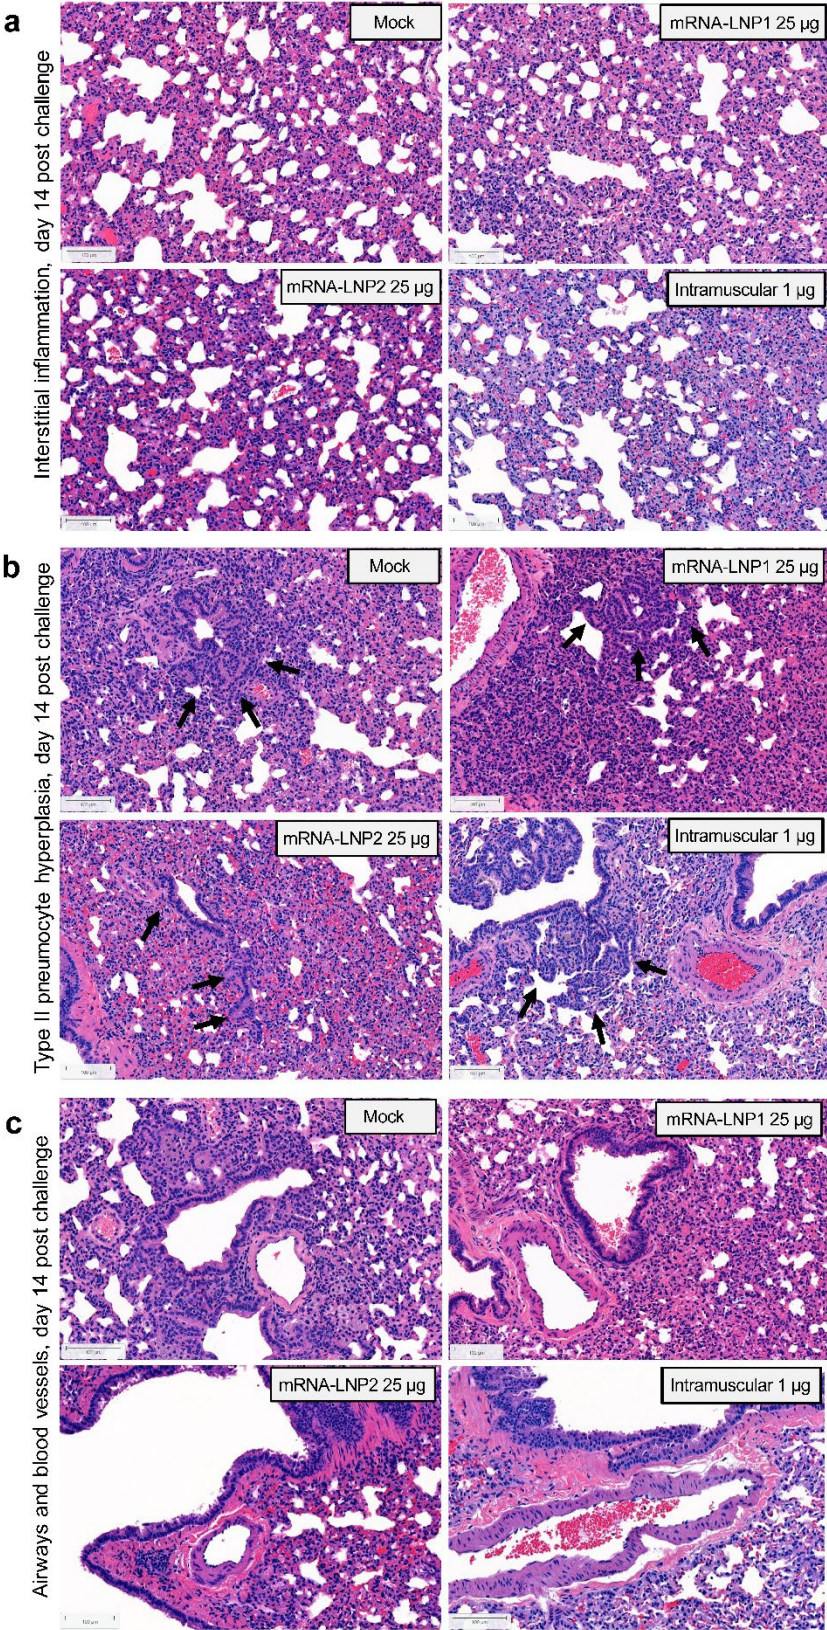

**Fig. S2. Pulmonary pathology characteristics at 14 days after SARS-CoV-2 challenge in vaccinated hamsters.** Lung sections from hamsters at 14 days after SARS-CoV-2 challenge were stained with H&E. Representative images of (a) interstitial inflammation, (b) type II pneumocyte hyperplasia (arrows), or (c) airways and blood vessels are shown for hamsters intranasally administered 2 doses of tris/sucrose buffer (mock-vaccinated), mRNA-LNP1 (25  $\mu$ g), mRNA-LNP2 (25  $\mu$ g), or were intramuscularly vaccinated with 2 doses of vaccine (1.0  $\mu$ g). Scale bars = 100  $\mu$ m.

H&E, hematoxylin and eosin; IN, intranasal; SARS-CoV-2, severe acute respiratory syndrome coronavirus 2.

**Fig. S3.**

a.

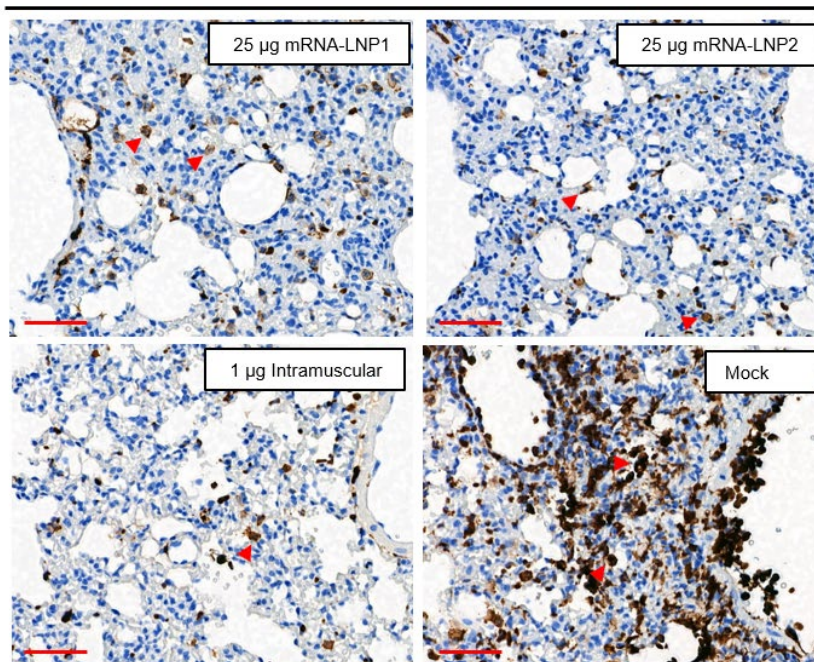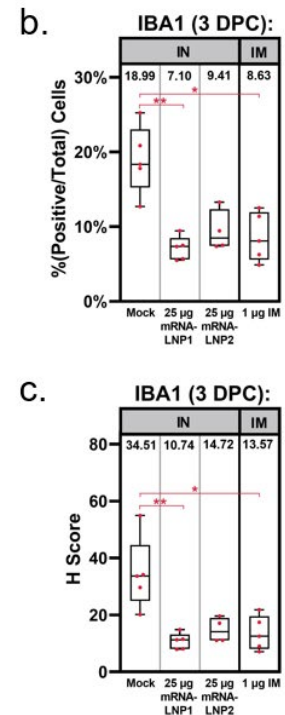

**Fig. S3. Immunohistochemistry assessment of innate immune response via macrophage**

**marker IBA1 at 3 days after SARS-CoV-2 challenge.** Lungs sections from hamsters

necropsied at 3 days post SARS-CoV-2 challenge were stained for macrophage marker IBA1.

(a) Representational images of hamster lung with 2 doses of either tris/sucrose, 25 µg

mRNA-LNP1, 25 µg mRNA-LNP2, or 1 µg IM composition. (b) Quantification of cells

positive for IBA1 in each of the above represented groups. (c) Quantification of staining

intensity of cells positive for IBA1 in each of the above represented groups. Scale bars

represent 50 µm. Animal-level data are shown as dots ( $n = 4$  to 5 animals per group), with

boxes and horizontal bars denoting the IQR and median, respectively, and whiskers

representing the maximum and minimum values. Means are stated above each boxplot.

Kruskal-Wallis non-parametric test was implemented for statistical analysis to accommodate

for small sample sizes per group.  $*P < 0.05$ ;  $**P < 0.01$ ;  $***P < 0.001$ .

DPC, days post challenge; IBA1, ionized calcium-binding adapter molecule 1; IM, intramuscular; IN, intranasal; LNP, lipid nanoparticle; mRNA, messenger RNA; SARS-CoV-2, severe acute respiratory syndrome coronavirus 2.

**Table S1. Statistical comparisons of ancestral S-specific serum binding IgG antibody titers after vaccination**

| Comparison                                       | Estimated Fold-change<br>(95% CI) | Adjusted P-value |
|--------------------------------------------------|-----------------------------------|------------------|
| Dose 1 (Day 21)                                  |                                   |                  |
| 25- $\mu$ g mRNA-LNP1 over 5- $\mu$ g mRNA-LNP1  | 68.53<br>(25.63-185.69)           | <1e-6            |
| 25- $\mu$ g mRNA-LNP2 over 5- $\mu$ g mRNA-LNP1  | 67.68<br>(25.04-182.43)           | <1e-6            |
| 5- $\mu$ g mRNA-LNP2 over 5- $\mu$ g mRNA-LNP1   | 50.61<br>(22.1-117.24)            | <1e-6            |
| 25- $\mu$ g mRNA-LNP1 over 0.4- $\mu$ g IM       | 3.11<br>(0.86-11.06)              | 0.9619           |
| 25- $\mu$ g mRNA-LNP1 over 1- $\mu$ g IM         | 1.63<br>(0.61-4.38)               | 0.8426           |
| 5- $\mu$ g mRNA-LNP1 over 0.4- $\mu$ g IM        | 0.05<br>(0.02-0.14)               | <1e-6            |
| 5- $\mu$ g mRNA-LNP1 over 1- $\mu$ g IM          | 0.02<br>(0.01-0.05)               | <1e-6            |
| 25- $\mu$ g mRNA-LNP2 over 25- $\mu$ g mRNA-LNP1 | 0.99<br>(0.31-3.14)               | 0.4892           |
| 25- $\mu$ g mRNA-LNP2 over 5- $\mu$ g mRNA-LNP2  | 1.34<br>(0.5-3.71)                | 0.7183           |
| 25- $\mu$ g mRNA-LNP2 over 0.4- $\mu$ g IM       | 3.07<br>(0.9-11.02)               | 0.9635           |
| 25- $\mu$ g mRNA-LNP2 over 1- $\mu$ g IM         | 1.61<br>(0.6-4.4)                 | 0.8312           |
| 5- $\mu$ g mRNA-LNP2 over 25- $\mu$ g mRNA-LNP1  | 0.74<br>(0.27-2.03)               | 0.2668           |
| 5- $\mu$ g mRNA-LNP2 over 0.4- $\mu$ g IM        | 2.3<br>(0.75-6.89)                | 0.9359           |
| 5- $\mu$ g mRNA-LNP2 over 1- $\mu$ g IM          | 1.2<br>(0.54-2.69)                | 0.6883           |
| 1- $\mu$ g IM over 0.4- $\mu$ g IM               | 1.91<br>(0.63-5.83)               | 0.8853           |
| Dose 2 (Day 41)                                  |                                   |                  |
| 25- $\mu$ g mRNA-LNP1 over 5- $\mu$ g mRNA-LNP1  | 3.64<br>(1.54-8.55)               | 0.0024           |
| 25- $\mu$ g mRNA-LNP2 over 25- $\mu$ g mRNA-LNP1 | 3.68<br>(1.78-7.55)               | 6e-04            |
| 25- $\mu$ g mRNA-LNP2 over 5- $\mu$ g mRNA-LNP1  | 13.38<br>(5.58-31.97)             | <1e-6            |
| 25- $\mu$ g mRNA-LNP2 over 5- $\mu$ g mRNA-LNP2  | 2.7<br>(1.1-6.61)                 | 0.0156           |

|                                                 |                     |        |
|-------------------------------------------------|---------------------|--------|
| 5- $\mu$ g mRNA-LNP2 over 5- $\mu$ g mRNA-LNP1  | 4.95<br>(1.8-13.8)  | 0.0023 |
| 25- $\mu$ g mRNA-LNP1 over 0.4- $\mu$ g IM      | 0.61<br>(0.27-1.34) | 0.1004 |
| 25- $\mu$ g mRNA-LNP1 over 1- $\mu$ g IM        | 0.37<br>(0.17-0.86) | 0.0138 |
| 5- $\mu$ g mRNA-LNP1 over 0.4- $\mu$ g IM       | 0.17<br>(0.06-0.43) | 2e-04  |
| 5- $\mu$ g mRNA-LNP1 over 1- $\mu$ g IM         | 0.1<br>(0.04-0.27)  | 2e-04  |
| 25- $\mu$ g mRNA-LNP2 over 0.4- $\mu$ g IM      | 2.24<br>(0.99-4.93) | 0.9742 |
| 25- $\mu$ g mRNA-LNP2 over 1- $\mu$ g IM        | 1.38<br>(0.61-3.2)  | 0.7796 |
| 5- $\mu$ g mRNA-LNP2 over 25- $\mu$ g mRNA-LNP1 | 1.36<br>(0.56-3.32) | 0.7592 |
| 5- $\mu$ g mRNA-LNP2 over 0.4- $\mu$ g IM       | 0.83<br>(0.32-2.27) | 0.3406 |
| 5- $\mu$ g mRNA-LNP2 over 1- $\mu$ g IM         | 0.51<br>(0.19-1.38) | 0.0894 |
| 1- $\mu$ g IM over 0.4- $\mu$ g IM              | 1.63<br>(0.63-3.98) | 0.8621 |

---

CI, confidence interval; IgG, immunoglobulin G; IM, intramuscular; LNP, lipid nanoparticle; mRNA, messenger RNA.



**Table S2. Statistical comparisons of ancestral S-specific serum binding IgA antibody titers after vaccination**

| Comparison                                       | Estimated Fold-change<br>(95% CI) | Adjusted<br>P-value |
|--------------------------------------------------|-----------------------------------|---------------------|
| Dose 1 (Day 21)                                  |                                   |                     |
| 25- $\mu$ g mRNA-LNP2 over 25- $\mu$ g mRNA-LNP1 | 83.81<br>(38.04-224.25)           | <1e-6               |
| 25- $\mu$ g mRNA-LNP2 over 5- $\mu$ g mRNA-LNP2  | 32.7<br>(3.92-716.22)             | 0.0035              |
| 25- $\mu$ g mRNA-LNP2 over 0.4- $\mu$ g IM       | 2.84<br>(1.18-6.73)               | 0.0104              |
| 25- $\mu$ g mRNA-LNP1 over 0.4- $\mu$ g IM       | 0.03<br>(0.01-0.09)               | <1e-6               |
| 25- $\mu$ g mRNA-LNP1 over 1- $\mu$ g IM         | 0.02<br>(0.01-0.05)               | <1e-6               |
| 25- $\mu$ g mRNA-LNP2 over 1- $\mu$ g IM         | 1.7<br>(0.72-3.93)                | 0.8993              |
| 5- $\mu$ g mRNA-LNP2 over 25- $\mu$ g mRNA-LNP1  | 2.56<br>(0.12-24.18)              | 0.8043              |
| 5- $\mu$ g mRNA-LNP2 over 0.4- $\mu$ g IM        | 0.09<br>(<1e-6-0.8)               | 0.0171              |
| 5- $\mu$ g mRNA-LNP2 over 1- $\mu$ g IM          | 0.05<br>(<1e-6-0.44)              | 0.0066              |
| 1- $\mu$ g IM over 0.4- $\mu$ g IM               | 1.67<br>(0.67-4.14)               | 0.8746              |
| Dose 2 (Day 41)                                  |                                   |                     |
| 25- $\mu$ g mRNA-LNP1 over 5- $\mu$ g mRNA-LNP1  | 3.74<br>(1.37-10.19)              | 0.0051              |
| 25- $\mu$ g mRNA-LNP2 over 25- $\mu$ g mRNA-LNP1 | 5.77<br>(2.57-12.95)              | <1e-6               |
| 25- $\mu$ g mRNA-LNP2 over 5- $\mu$ g mRNA-LNP1  | 21.57<br>(7.93-60.5)              | <1e-6               |
| 25- $\mu$ g mRNA-LNP2 over 5- $\mu$ g mRNA-LNP2  | 4.05<br>(1.37-11.73)              | 0.0066              |
| 5- $\mu$ g mRNA-LNP2 over 5- $\mu$ g mRNA-LNP1   | 5.33<br>(1.55-18.18)              | 0.006               |
| 25- $\mu$ g mRNA-LNP1 over 0.4- $\mu$ g IM       | 0.21<br>(0.08-0.52)               | 0.0025              |
| 25- $\mu$ g mRNA-LNP1 over 1- $\mu$ g IM         | 0.13<br>(0.05-0.33)               | <1e-6               |
| 5- $\mu$ g mRNA-LNP1 over 0.4- $\mu$ g IM        | 0.06<br>(0.02-0.18)               | <1e-6               |
| 5- $\mu$ g mRNA-LNP1 over 1- $\mu$ g IM          | 0.03<br>(0.01-0.1)                | <1e-6               |
| 25- $\mu$ g mRNA-LNP2 over 0.4- $\mu$ g IM       | 1.21<br>(0.47-3.09)               | 0.6658              |
| 25- $\mu$ g mRNA-LNP2 over 1- $\mu$ g IM         | 0.73<br>(0.28-1.88)               | 0.2411              |
| 5- $\mu$ g mRNA-LNP2 over 25- $\mu$ g mRNA-LNP1  | 1.43<br>(0.51-4.12)               | 0.7531              |

|                                           |                     |        |
|-------------------------------------------|---------------------|--------|
| 5- $\mu$ g mRNA-LNP2 over 0.4- $\mu$ g IM | 0.3<br>(0.09-0.95)  | 0.0219 |
| 5- $\mu$ g mRNA-LNP2 over 1- $\mu$ g IM   | 0.18<br>(0.06-0.57) | 0.0044 |
| 1- $\mu$ g IM over 0.4- $\mu$ g IM        | 1.67<br>(0.58-4.79) | 0.8428 |

---

CI, confidence interval; IgA, immunoglobulin A; IM, intramuscular; LNP, lipid nanoparticle; mRNA, messenger RNA.

**Table S3. Statistical comparisons of serum neutralizing antibody titers against ancestral SARS-CoV-2 after vaccination**

| Comparison                                       | Estimated Fold-change<br>(95% CI) | Adjusted P-value |
|--------------------------------------------------|-----------------------------------|------------------|
| Dose 1 (Day 21)                                  |                                   |                  |
| 25- $\mu$ g mRNA-LNP2 over 25- $\mu$ g mRNA-LNP1 | 38.84<br>(8.7-287.37)             | <1e-6            |
| 25- $\mu$ g mRNA-LNP2 over 5- $\mu$ g mRNA-LNP2  | 17.46<br>(2.21-275.24)            | 0.0044           |
| 25- $\mu$ g mRNA-LNP2 over 0.4- $\mu$ g IM       | 8.09<br>(1.09-96.32)              | 0.0205           |
| 25- $\mu$ g mRNA-LNP1 over 0.4- $\mu$ g IM       | 0.21<br>(0.02-2.64)               | 0.0801           |
| 25- $\mu$ g mRNA-LNP1 over 1- $\mu$ g IM         | 0.06<br>(0.01-0.21)               | <1e-6            |
| 25- $\mu$ g mRNA-LNP2 over 1- $\mu$ g IM         | 2.16<br>(0.63-7.5)                | 0.8996           |
| 5- $\mu$ g mRNA-LNP2 over 25- $\mu$ g mRNA-LNP1  | 2.22<br>(0.12-24.4)               | 0.7781           |
| 5- $\mu$ g mRNA-LNP2 over 0.4- $\mu$ g IM        | 0.46<br>(0.02-7.72)               | 0.275            |
| 5- $\mu$ g mRNA-LNP2 over 1- $\mu$ g IM          | 0.12<br>(0.01-0.77)               | 0.0149           |
| 1- $\mu$ g IM over 0.4- $\mu$ g IM               | 3.74<br>(0.6-39.29)               | 0.9309           |
| Dose 2 (Day 41)                                  |                                   |                  |
| 25- $\mu$ g mRNA-LNP1 over 5- $\mu$ g mRNA-LNP1  | 5.07<br>(1.53-18.22)              | 0.0054           |
| 25- $\mu$ g mRNA-LNP2 over 25- $\mu$ g mRNA-LNP1 | 5.7<br>(2.28-14.07)               | 0.0008           |
| 25- $\mu$ g mRNA-LNP2 over 5- $\mu$ g mRNA-LNP1  | 28.89<br>(8.5-111.28)             | <1e-6            |
| 25- $\mu$ g mRNA-LNP2 over 5- $\mu$ g mRNA-LNP2  | 5.08<br>(1.46-18.06)              | 0.0059           |
| 5- $\mu$ g mRNA-LNP2 over 5- $\mu$ g mRNA-LNP1   | 5.69<br>(1.32-27.13)              | 0.0119           |
| 25- $\mu$ g mRNA-LNP1 over 0.4- $\mu$ g IM       | 0.36<br>(0.14-0.91)               | 0.0173           |
| 25- $\mu$ g mRNA-LNP1 over 1- $\mu$ g IM         | 0.17<br>(0.06-0.45)               | 0.0004           |
| 5- $\mu$ g mRNA-LNP1 over 0.4- $\mu$ g IM        | 0.07<br>(0.02-.024)               | 0.0002           |
| 5- $\mu$ g mRNA-LNP1 over 1- $\mu$ g IM          | 0.03<br>(0.01-0.12)               | <1e-6            |
| 25- $\mu$ g mRNA-LNP2 over 0.4- $\mu$ g IM       | 2.06<br>(0.83-5.26)               | 0.94             |
| 25- $\mu$ g mRNA-LNP2 over 1- $\mu$ g IM         | 0.96<br>(0.33-2.65)               | 0.4737           |
| 5- $\mu$ g mRNA-LNP2 over 25- $\mu$ g mRNA-LNP1  | 1.12                              | 0.5776           |

|                                           |                     |        |
|-------------------------------------------|---------------------|--------|
|                                           | (0.32-3.86)         |        |
| 5- $\mu$ g mRNA-LNP2 over 0.4- $\mu$ g IM | 0.41<br>(0.12-1.43) | 0.0758 |
| 5- $\mu$ g mRNA-LNP2 over 1- $\mu$ g IM   | 0.19<br>(0.05-0.69) | 0.0065 |
| 1- $\mu$ g IM over 0.4- $\mu$ g IM        | 2.15<br>(0.77-6.24) | 0.9333 |

---

CI, confidence interval, IM, intramuscular; LNP, lipid nanoparticle; mRNA, messenger RNA.

**Table S4. Statistical comparisons of viral load by plaque assay<sup>a</sup> in the lungs of vaccinated hamsters at 3 days after SARS-CoV-2 challenge**

| Comparison                           | Fold-change<br>(standard error) | <i>t</i> -ratio | P-value |
|--------------------------------------|---------------------------------|-----------------|---------|
| 0.4-μg IM over 1-μg IM               | 2.32<br>(1.23)                  | 1.88            | 0.783   |
| 0.4-μg IM over 25-μg mRNA-LNP1       | 1.15<br>(1.17)                  | 0.98            | 1       |
| 0.4-μg IM over 5-μg mRNA-LNP1        | -1.91<br>(1.11)                 | -1.72           | 0.881   |
| 0.4-μg IM over 25-μg mRNA-LNP2       | 2.77<br>(1.05)                  | 2.64            | 0.245   |
| 0.4-μg IM over 5-μg mRNA-LNP2        | 0.99<br>(0.98)                  | 1.01            | 1       |
| 0.4-μg IM over mock                  | -2.60<br>(0.90)                 | -2.88           | 0.148   |
| 1-μg IM over 25-μg mRNA-LNP1         | 0.01<br>(1.23)                  | 0.01            | 1       |
| 1-μg IM over 5-μg mRNA-LNP1          | -3.05<br>(1.17)                 | -2.60           | 0.266   |
| 1-μg IM over 25-μg mRNA-LNP2         | 1.63<br>(1.11)                  | 1.46            | 0.97    |
| 1-μg IM over 5-μg mRNA-LNP2          | -0.15<br>(1.05)                 | -0.15           | 1       |
| 1-μg IM over mock                    | -3.73<br>(0.98)                 | -3.82           | 0.014   |
| 25-μg mRNA-LNP1 over 5-μg mRNA-LNP1  | -1.88<br>(1.23)                 | -1.53           | 0.955   |
| 25-μg mRNA-LNP1 over 25-μg mRNA-LNP2 | 2.79<br>(1.17)                  | 2.39            | 0.401   |
| 25-μg mRNA-LNP1 over 5-μg mRNA-LNP2  | 1.02<br>(1.11)                  | 0.91            | 1       |
| 25-μg mRNA-LNP1 over mock            | -2.57<br>(1.05)                 | -2.45           | 0.354   |
| 5-μg mRNA-LNP1 over 25-μg mRNA-LNP2  | 5.85<br>(1.23)                  | 4.76            | 0.001   |
| 5-μg mRNA-LNP1 over 5-μg mRNA-LNP2   | 4.07<br>(1.17)                  | 3.48            | 0.035   |
| 5-μg mRNA-LNP1 over mock             | 0.49<br>(1.11)                  | 0.44            | 1       |
| 25-μg mRNA-LNP2 over 5-μg mRNA-LNP2  | -0.60<br>(1.23)                 | -0.49           | 1       |
| 25-μg mRNA-LNP2 over mock            | -4.18<br>(1.17)                 | -3.57           | 0.027   |
| 5-μg mRNA-LNP2 over mock             | -2.40<br>(1.23)                 | -1.96           | 0.731   |

<sup>a</sup>Viral loads (log<sub>10</sub> transformed) were assessed by ordinary linear regression; only modeled data at Day 3 after challenge was evaluated since viral loads on Day 14 were zero for all hamsters. A degree of freedom of 28 was used.

IM, intramuscular; LNP, lipid nanoparticle; mRNA, messenger RNA.

**Table S5. Statistical comparisons of viral load by plaque assay in the nasal turbinates of vaccinated hamsters at 3 days after SARS-CoV-2 challenge**

| Comparison                                       | Fold-change<br>(standard error) | <i>t</i> -ratio | P-value |
|--------------------------------------------------|---------------------------------|-----------------|---------|
| 0.4- $\mu$ g IM over 1- $\mu$ g IM               | 3.09<br>(0.87)                  | 3.56            | 0.028   |
| 0.4- $\mu$ g IM over 25- $\mu$ g mRNA-LNP1       | 0.55<br>(0.83)                  | 0.67            | 1       |
| 0.4- $\mu$ g IM over 5- $\mu$ g mRNA-LNP1        | -0.97<br>(0.78)                 | -1.24           | 0.995   |
| 0.4- $\mu$ g IM over 25- $\mu$ g mRNA-LNP2       | 2.59<br>(0.74)                  | 3.52            | 0.031   |
| 0.4- $\mu$ g IM over 5- $\mu$ g mRNA-LNP2        | 1.30<br>(0.69)                  | 1.89            | 0.779   |
| 0.4- $\mu$ g IM over mock                        | -2.02<br>(0.64)                 | -3.18           | 0.073   |
| 1- $\mu$ g IM over 25- $\mu$ g mRNA-LNP1         | -1.53<br>(0.87)                 | -1.76           | 0.86    |
| 1- $\mu$ g IM over 5- $\mu$ g mRNA-LNP1          | -3.05<br>(0.83)                 | -3.69           | 0.02    |
| 1- $\mu$ g IM over 25- $\mu$ g mRNA-LNP2         | 0.52<br>(0.78)                  | 0.66            | 1       |
| 1- $\mu$ g IM over 5- $\mu$ g mRNA-LNP2          | -0.78<br>(0.74)                 | -1.05           | 0.999   |
| 1- $\mu$ g IM over mock                          | -4.09<br>(0.69)                 | -5.95           | 0       |
| 25- $\mu$ g mRNA-LNP1 over 5- $\mu$ g mRNA-LNP1  | -0.51<br>(0.87)                 | -0.59           | 1       |
| 25- $\mu$ g mRNA-LNP1 over 25- $\mu$ g mRNA-LNP2 | 3.06<br>(0.83)                  | 3.70            | 0.019   |
| 25- $\mu$ g mRNA-LNP1 over 5- $\mu$ g mRNA-LNP2  | 1.76<br>(0.78)                  | 2.25            | 0.5     |
| 25- $\mu$ g mRNA-LNP1 over mock                  | -1.56<br>(0.74)                 | -2.11           | 0.607   |
| 5- $\mu$ g mRNA-LNP1 over 25- $\mu$ g mRNA-LNP2  | 4.58<br>(0.87)                  | 5.29            | 0       |
| 5- $\mu$ g mRNA-LNP1 over 5- $\mu$ g mRNA-LNP2   | 3.28<br>(0.83)                  | 3.98            | 0.009   |
| 5- $\mu$ g mRNA-LNP1 over mock                   | -0.03<br>(0.78)                 | -0.04           | 1       |
| 25- $\mu$ g mRNA-LNP2 over 5- $\mu$ g mRNA-LNP2  | -0.28<br>(0.87)                 | -0.33           | 1       |
| 25- $\mu$ g mRNA-LNP2 over mock                  | -3.60<br>(0.83)                 | -4.36           | 0.003   |
| 5- $\mu$ g mRNA-LNP2 over mock                   | -2.31<br>(0.87)                 | -2.66           | 0.236   |

<sup>a</sup>Viral loads ( $\log_{10}$  transformed) were assessed by ordinary linear regression; only modeled data at Day 3 after challenge was evaluated since viral loads on Day 14 were zero for all hamsters. A degree of freedom of 28 was used.

IM, intramuscular; LNP, lipid nanoparticle; mRNA, messenger RNA.

**Table S6. Major pulmonary histopathological findings and severity scores after SARS-CoV-2 challenge by vaccine group**

| Day 3 (After Challenge)               |                 |                                  |                                   |                                  |                                   |                   |                 |
|---------------------------------------|-----------------|----------------------------------|-----------------------------------|----------------------------------|-----------------------------------|-------------------|-----------------|
|                                       | Intranasal      |                                  |                                   |                                  | Intramuscular                     |                   |                 |
|                                       | Mock<br>(n = 5) | mRNA-<br>LNP1<br>5 µg<br>(n = 5) | mRNA-<br>LNP1<br>25 µg<br>(n = 5) | mRNA-<br>LNP2<br>5 µg<br>(n = 5) | mRNA-<br>LNP2<br>25 µg<br>(n = 5) | 0.4 µg<br>(n = 5) | 1 µg<br>(n = 5) |
| Interstitial inflammation, n          |                 |                                  |                                   |                                  |                                   |                   |                 |
| Group total                           | 5               | 5                                | 5                                 | 5                                | 5                                 | 5                 | 5               |
| 2 (mild)                              | 2               | 4                                | 2                                 | 2                                | 1                                 | 5                 | 2               |
| 3 (moderate)                          | 3               | 1                                | 3                                 | 3                                | 4                                 | 0                 | 3               |
| Bronchial/bronchiolar inflammation, n |                 |                                  |                                   |                                  |                                   |                   |                 |
| Group total                           | 4               | 5                                | 1                                 | 3                                | 1                                 | 3                 | 4               |
| 1 (minimal)                           | 2               | 1                                | 1                                 | 1                                | 0                                 | 2                 | 3               |
| 2 (mild)                              | 0               | 3                                | 0                                 | 2                                | 1                                 | 1                 | 1               |
| 3 (moderate)                          | 2               | 1                                | 0                                 | 0                                | 0                                 | 0                 | 0               |
| Vascular inflammation, n              |                 |                                  |                                   |                                  |                                   |                   |                 |
| Group total                           | 4               | 3                                | 2                                 | 3                                | 2                                 | 4                 | 1               |
| 1 (minimal)                           | 0               | 1                                | 1                                 | 1                                | 1                                 | 3                 | 0               |
| 2 (mild)                              | 2               | 2                                | 1                                 | 1                                | 0                                 | 1                 | 1               |
| 3 (moderate)                          | 2               | 0                                | 0                                 | 1                                | 1                                 | 0                 | 0               |
| Day 14 (After Challenge)              |                 |                                  |                                   |                                  |                                   |                   |                 |
|                                       | Intranasal      |                                  |                                   |                                  | Intramuscular                     |                   |                 |
|                                       | Mock<br>(n = 5) | mRNA-<br>LNP1<br>5 µg<br>(n = 5) | mRNA-<br>LNP1<br>25 µg<br>(n = 5) | mRNA-<br>LNP2<br>5 µg<br>(n = 4) | mRNA-<br>LNP2<br>25 µg<br>(n = 4) | 0.4 µg<br>(n = 5) | 1 µg<br>(n = 5) |
| Interstitial inflammation, n          |                 |                                  |                                   |                                  |                                   |                   |                 |
| Group total                           | 5               | 5                                | 5                                 | 4                                | 4                                 | 5                 | 5               |
| 2 (mild)                              | 0               | 5                                | 4                                 | 0                                | 4                                 | 4                 | 3               |
| 3 (moderate)                          | 5               | 0                                | 1                                 | 4                                | 0                                 | 1                 | 2               |
| Type II pneumocyte hyperplasia, n     |                 |                                  |                                   |                                  |                                   |                   |                 |
| Group total                           | 5               | 4                                | 5                                 | 4                                | 2                                 | 1                 | 5               |
| 1 (minimal)                           | 0               | 3                                | 3                                 | 1                                | 2                                 | 0                 | 0               |
| 2 (mild)                              | 4               | 1                                | 1                                 | 2                                | 0                                 | 0                 | 3               |
| 3 (moderate)                          | 1               | 0                                | 1                                 | 1                                | 0                                 | 1                 | 2               |
| Bronchial/bronchiolar inflammation, n |                 |                                  |                                   |                                  |                                   |                   |                 |
| Group total                           | 4               | 3                                | 2                                 | 3                                | 1                                 | 1                 | 3               |
| 1 (minimal)                           | 2               | 3                                | 2                                 | 1                                | 1                                 | 1                 | 3               |
| 2 (mild)                              | 2               | 0                                | 0                                 | 2                                | 0                                 | 0                 | 0               |
| Vascular inflammation, n              |                 |                                  |                                   |                                  |                                   |                   |                 |
| Group total                           | 1               | 4                                | 4                                 | 4                                | 1                                 | 5                 | 3               |
| 1 (minimal)                           | 1               | 4                                | 4                                 | 4                                | 1                                 | 5                 | 3               |

IM, intramuscular; LNP, lipid nanoparticle; mRNA, messenger RNA; SARS-CoV-2, severe acute respiratory syndrome coronavirus 2.

**Table S7. Summary of hamsters positive for SARS-CoV-2 N-protein at 3 days after challenge**

| <b>Vaccine Group</b> | <b>Administration Route</b> | <b>Ratio of N-protein Positive Hamsters to Total Population (n/N)</b> |
|----------------------|-----------------------------|-----------------------------------------------------------------------|
| Mock                 | IN                          | 5/5                                                                   |
| mRNA-LNP1 5 µg       | IN                          | 5/5                                                                   |
| mRNA-LNP1 25 µg      | IN                          | 2/5                                                                   |
| mRNA-LNP2 5 µg       | IN                          | 4/5                                                                   |
| mRNA-LNP2 25 µg      | IN                          | 4/5                                                                   |
| Intramuscular 0.4 µg | IM                          | 3/5                                                                   |
| Intramuscular 1 µg   | IM                          | 2/5                                                                   |

IN, intranasal; IM, intramuscular; LNP, lipid nanoparticle; mRNA, messenger RNA; N protein, nucleocapsid protein; SARS-CoV-2, severe acute respiratory syndrome coronavirus 2.



**Table S8. Antibody Experimental Details**

| <b>Antibody</b>         | <b>Target</b>           | <b>Clone</b> | <b>Company<br/>(Cat No.)</b> | <b>Dilution<br/>(Vol:Vol)</b> | <b>Antigen<br/>Retrieval Buffer</b> |
|-------------------------|-------------------------|--------------|------------------------------|-------------------------------|-------------------------------------|
| SARS-CoV-2<br>N-Protein | Covid<br>infected cells | N/A          | GeneTex<br>(GTX135357)       | (1:4K)                        | 1                                   |
| IBA1                    | Macrophages             | EPR16588     | Abcam<br>(ab178846)          | (1:10K)                       | 1                                   |
| CD3                     | T cells<br>(general)    | SP162        | Abcam<br>(ab135372)          | (1:300)                       | 2                                   |
| CD20                    | B cells                 | SP32         | Abcam<br>(ab64088)           | (1:100)                       | 2                                   |
| CD4                     | Helper T Cells          | D7D2Z        | CST<br>(77699S)              | (1:100)                       | 1                                   |

\*(Vol:Vol) is the ratio of volume of antibody to solution it is diluted in; \*\*N/A: Not applicable.
